1 **Diversity and stability of microbiota are key factors associated to healthy and diseased**  
2 ***Crassostrea gigas* oysters**

3 Running title: **Links between oyster fitness and microbiota composition**

4  
5 Camille Clerissi<sup>\*1,2,3</sup>, Julien de Lorgeril<sup>1,3</sup>, Bruno Petton<sup>4</sup>, Aude Lucasson<sup>1,3</sup>, Jean-Michel  
6 Escoubas<sup>1,2</sup>, Yannick Gueguen<sup>1,3</sup>, Guillaume Mitta<sup>1</sup>, Eve Toulza<sup>\*1,2</sup>.

7  
8 1, IHPE UMR 5244, CNRS, Ifremer, Université de Montpellier, Université de Perpignan Via  
9 Domitia, France

10 2, CNRS, IHPE UMR 5244, Ifremer, Université de Montpellier, Université de Perpignan Via  
11 Domitia, France

12 3, Ifremer, IHPE UMR 5244, CNRS, Université de Perpignan Via Domitia, Université de  
13 Montpellier, CC80, F-34095, Montpellier, France

14 4, Ifremer, LEMAR UMR 6539 (Univ. Bretagne Occidentale, CNRS, IRD, Ifremer), 11  
15 presqu'île du Vivier, 29840 Argenton-en-Landunvez, France

16

17 \*Corresponding author: Eve Toulza. Mailing address: IHPE UMR 5244, Université de  
18 Perpignan via Domitia, 52 Avenue Paul Alduy, F-66860 Perpignan Cedex, France. Phone:  
19 +33 468 662 187. Fax: +33 468 662 281. E-mail: [eve.toulza@univ-perp.fr](mailto:eve.toulza@univ-perp.fr)

20 Camille Clerissi. Mailing address: IHPE UMR 5244, Université de Perpignan via Domitia, 52  
21 Avenue Paul Alduy, F-66860 Perpignan Cedex, France. Phone: +33 468 662 050. Fax: +33  
22 468 662 281. E-mail: [camille.clerissi@univ-perp.fr](mailto:camille.clerissi@univ-perp.fr)

23

24 **311 words for the abstract and 4508 words for the text**

25 Keywords: holobiont, microbiome, metabarcoding, fitness, bacteria.

26

27

## Abstract

28 Associations between micro- and macro-organisms (forming holobionts) are common and  
29 mostly specific in nature. Although microbes might contribute to the holobiont homeostasis,  
30 their role in the adaptive capacities of the holobiont remains unclear in most of the living  
31 species, and studies testing the links between host fitness and microbiota characteristics are  
32 still lacking.

33 To tackle this issue, we analyzed the microbiota of full-sib progenies from five biparental  
34 oyster families in a controlled condition (hatchery) and after transplantation during non-  
35 stressful or stressful periods in two geographic regions (Atlantic Ocean and Mediterranean  
36 Sea). We used 16S rRNA gene-metabarcoding to study taxonomic compositions of microbial  
37 communities. First, comparisons of microbial assemblages showed that environmental  
38 conditions highly influenced oyster microbiota. However, different ecological niches existed  
39 between oyster tissues and seawater, and even between the five families. Secondly, because  
40 two oyster families displayed high mortalities in both stressful periods, we compared their  
41 microbiota characteristics to the three other families. All oyster microbiota were highly  
42 modified after transplantation and no clear microbiota dysbiosis was observed for the two  
43 susceptible families. Moreover, despite similar levels of mortalities in both geographic  
44 regions, we identified many differences of microbial assemblages between resistant and  
45 susceptible families in the Atlantic Ocean, but few in the Mediterranean Sea. Particularly,  
46 susceptible families showed lower diversity of their microbiota than the resistant ones in  
47 stressful periods. Secondly, we highlighted that microbiota of susceptible oyster families had  
48 higher variability than the resistant ones at the scale of bacterial orders, but also less  
49 variability at the scale of OTUs. Lastly, while resistant families had increased relative  
50 abundances of cyanobacteria (Subsection III, family I) during the stressful period, susceptible  
51 oysters had low stability of Rhodospirillales, Rhodobacterales, Flavobacteriaceae and  
52 Erythrobacteraceae.

53 This study highlighted links between microbiota diversity and low variability of microbial  
54 assemblages at higher taxonomic ranks with oyster mortalities. We also identified bacterial  
55 taxa related to oyster fitness.

56

## Introduction

57 Interactions between micro- and macroorganisms are ubiquitous on Earth, from host-pathogen  
58 relationships [1] to the widely distributed commensalism or mutualism [2,3]. Previous  
59 observations suggested that composition of host-associated microbial communities (hereafter  
60 named microbiota) are not random, but might be linked to host taxonomy and physiology.  
61 Indeed, specific associations were found for microbiota of phylogenetically distant species of  
62 mice, flies, mosquitoes, wasps and hominids [4], but also for microbiota of closely related  
63 species of corals [5], hydra [6], or oysters [7]. Moreover, many studies showed that these  
64 interactions were not stable when hosts were in stressful conditions or in different  
65 physiological conditions. For example, microbiota compositions were found to be very  
66 different between healthy and diseased corals [8], or between oysters exposed to different  
67 temperatures [9].

68 Microbial associates might provide benefits to their hosts for survival, but also homeostasis  
69 and development [10]. First, a stable microbiota can play a role of physical barriers against  
70 pathogens. For example, healthy mice developed *Salmonella* infection after antibiotic  
71 treatments [11]. Other studies highlighted protective effects of (i) secondary endosymbiont of  
72 aphids against parasitoid wasps [12], (ii) toxic alkaloids produced by endophytic fungi of  
73 grasses against herbivores [13], or (iii) symbiotic bacteria of frogs against pathogenic fungi  
74 [14]. Secondly, because microbiota composition can change rapidly, they might represent  
75 mechanisms for rapid acclimation of the holobiont to changing environments [15]. In  
76 particular, fine-scale modifications of *Nematostella vectensis* microbiota were observed with  
77 environmental variations [16], suggesting that microbiota might participate to the  
78 maintenance of holobiont homeostasis. Hence, structure of microbiota might be multilayered  
79 with at least two populations of microbes: a stable host-adapted core microbiota and a more  
80 variable microbial pool [17]. However, the balance between stability and variability is still  
81 poorly studied. In particular, lack of knowledge concerns links between microbiota  
82 characteristics and fitness of holobionts facing environmental changes.

83 To tackle this issue, the farmed oyster *Crassostrea gigas* is a relevant model, as it filters  
84 seawater to feed. As a consequence, all oysters are in contact with the same environmental  
85 microbial communities, and microbiota variations are not biased towards different diets [18–  
86 20]. In addition, oysters are affected by recurrent mortality syndromes affecting mainly  
87 juveniles [21,22]. These mortalities are multifactorial processes due to water temperature and

quality, but also development of viral and bacterial pathogens [23–27]. Particularly, different susceptibilities were observed according to oyster physiology and/or genetic backgrounds [28–30], in association with microbiota dysbiosis [9]. Although oyster genetics and microbiota dysbiosis were associated to mortalities, no studies tried to disentangle the links between oyster fitness and microbiota characteristics.

Thus we produced full-sib progenies from five biparental oyster families (see Methods for more details) using genitors from different origins. In particular, males and female genitors were isolated from different geographic regions in France (Atlantic Ocean and Mediterranean Sea), and in different areas (farming areas or sites with lower densities of oysters, and potentially lower concentrations of pathogens). Then we transplanted progenies of each biparental family at two time periods in the Atlantic Ocean or in the Mediterranean Sea. These two time periods were selected according to seawater temperatures in order to study oysters in non-stressful and stressful periods. Particularly, it was previously observed that 16°C was a relevant threshold to define periods of stress, because high mortality rates were observed above this temperature [24,25]. After five days of transplantation, oysters were sampled, seawater was filtered, and we analyzed oyster-associated and seawater bacterial communities using 16S rRNA gene-metabarcoding.

This study aimed at (i) testing environmental effects on oyster microbiota, (ii) comparing oyster microbiota between resistant and susceptible phenotypes for periods of stress, and (iii) testing the balance between stability and variability of microbiota in changing environment.

The identification of such bacterial candidates might help to develop new production techniques for oyster farming in the future.

## Methods

### Genitors from different geographic origins

Biparental *C. gigas* oysters families were produced using a recently developed methodology that allowed the production of pathogen-free juveniles [25,27,31]. Four oysters families (F09, F15, F32 and F44) were produced from wild genitor sampled in farming and non-farming area in two geographic regions, the Mediterranean Sea and the Atlantic Ocean (Fig. S1). In addition, family F21 was produced using genitors from a massal breeding program aiming at increasing the resistance of *C. gigas* oysters against OsHV1-virus. It was performed by breeding disease survivors throughout four generations of selection [32]. Each family (cohort) thus corresponded to the offspring of a biparental reproduction (full-sib progenies). Maturation induction, reproduction and larval breeding were performed as described previously [25,33]. In the larval and post-larval stages, the oysters were fed with the same diet as the genitors at a concentration between 1500-2000  $\mu\text{m}^3 \mu\text{L}^{-1}$  [34]. Before experiments, all oyster families were maintained in controlled condition at the laboratory (Argenton, France) using seawater treated with UV, filtered through 1  $\mu\text{m}$  mesh, and enriched with a bi-specific phytoplankton diet made of *Tisochrysis lutea* (CCAP 927/14) and *Chaetoceros muelleri* (CCAP 1010/3) (in equal biomass proportion) at a ratio equivalent to 6% of the oyster dry mass [34]. Finally, all oysters remained free of any abnormal mortality.

### Experimental design

About 140 individuals of each oyster family were either kept in the controlled condition or placed in one out of four natural environments for five days. The four natural environments corresponded to two geographic site (Atlantic Ocean and Mediterranean Sea, see Fig. 1), and two time periods. These two time periods coincided to non-stressful and stressful periods according to seawater temperatures (below and above 16°C, respectively) (Table S1), and were confirmed by the observed mortality rates. After five days of transplantation, no mortality occurred and about 15 individuals of each family were flash frozen in liquid nitrogen and stored at -80°C. In addition, 125 oysters per family were also placed in controlled condition to monitor mortality rates. The number of dead oysters was estimated at day 13 (*i.e.*, eight days after the end of transplantation). Moreover, serial filtrations of 5 liters of seawater were performed for the five conditions using porosity of 10  $\mu\text{m}$  (Whatman<sup>TM</sup>

111115 Nucleopore™ Track-Etch Polycarbonate Membrane filter, 47 mm diameter), 5 µm (Whatman™ 111113 Nucleopore™ Track-Etch Polycarbonate Membrane filter, 47 mm diameter), 0.8 µm (Whatman™ 111109 Nucleopore™ Track-Etch Polycarbonate Membrane filter, 47 mm diameter), and 0.2 µm (Whatman™ 111106 Nucleopore™ Track-Etch Polycarbonate Membrane filter, 47 mm diameter).

## **DNA extraction, PCR and sequencing**

Frozen oysters were ground in liquid nitrogen in 50 ml stainless steel bowls using 20 mm diameter grinding balls (Retsch MM400 mill). The powders were stored at -80°C, and were then used for DNA extractions using the DNA from tissue Macherey-Nagel kit (reference 740952.250) according to the manufacturer's protocol. In order to improve DNA extractions, we nevertheless added a crushing step, that consisted in an additional 12 minutes mechanical lysis using zirconium beads before the 90 min enzymatic lysis in the presence of proteinase K. The same lysis and DNA extraction protocol was used for the different filters. DNA concentration and quality were checked with Epoch microplate spectrophotometer (BioTek Instruments, Inc.).

Then, the 16S rRNA gene of bacterial communities was amplified and sequenced using the variable V3V4 loops (341F: 5'-CCTACGGGNGGCWGCAG-3'; 805R: 5'-GACTACHVGGGTATCTAATCC-3') [35]. Paired-end sequencing (250 bp read length) was performed at the McGill University (Génome Québec Innovation Centre, Montréal, Canada) on the MiSeq system (Illumina) using the v2 chemistry according to the manufacturer's protocol. Raw sequence data are available in the SRA database (BioProject ID PRJNA419907).

## **Sequence analyses**

The FROGS pipeline (Find Rapidly OTU with Galaxy Solution) implemented into a galaxy instance (<http://sigenae-workbench.toulouse.inra.fr/galaxy/>) was used to define Operational Taxonomic Units (OTU), and computed taxonomic affiliations [36]. Briefly, paired reads were merged using FLASH [37]. After denoising and primer/adapters removal with cutadapt [38], *de novo* clustering was performed using SWARM that uses a local clustering threshold,

with aggregation distance  $d=3$  [39]. Chimera were removed using VSEARCH (*de novo* chimera detection) [40]. Particularly, this method divided each sequence into four fragments, and then looked for similarity with putative parents in the whole set of OTUs. We filtered the dataset for singletons and we annotated OTUs using Blast+ against the Silva database (release 123, September 2015) to produce an OTU and affiliation table in standard BIOM format. Rarefaction curves of species richness were produced using the {phyloseq} R package, and the rarefy\_even\_depth and ggrare functions [41]. The alpha diversity metrics (Chao1, Simpson and Shannon) were estimated at the OTU level with the estimate\_richness function. Moreover, Pielou's measure of species evenness was computed using the diversity function in {vegan}. We also used phyloseq to obtain abundances at different taxonomic ranks (from genus to phylum) (tax\_glom function). Multi-affiliation and unknown taxa were removed for the different taxonomic ranks if they corresponded to the addition of multiple OTUs having the same annotation. Because samples had different sequencing depths, we used relative abundances of OTUs and the different taxonomic ranks for subsequent analyses. We computed Bray-Curtis dissimilarities to study beta diversity, *i.e.*, distances between samples for OTU compositions (vegdist function, {vegan}).

## Statistical and multivariate analyses

All statistical analyses were done using R v3.3.1 (R: a language and environment for statistical computing, 2008; R Development Core Team, R Foundation for Statistical Computing, Vienna, Austria [<http://www.R-project.org>]).

Clustering and ordination methods were used to describe and compare composition of microbial communities between samples. Hierarchical clustering (average linkage (hclust {stats})) and principal coordinate analyses (hereafter named PCoA) of microbial communities were computed using Bray-Curtis dissimilarities (vegdist {vegan}). Factors associated to each sample were plotted face to clustering using the heatmap.2 function and the {gplots} package. Variability of oyster microbiota for stressful and non-stressful periods was estimated using PCoA and distances to centroid using betadisper {vegan}.

In order to explain modifications of microbial assemblages, we used redundancy analysis [42] which investigate the variations of the different OTUs under the constraint of different factors. OTUs were Hellinger-transformed [43] before testing their links with the following

variables: family, period (stressful or non-stressful) and site (Atlantic Ocean or Mediterranean Sea) of transplantation. In particular, we estimated the influence of these variables on microbial assemblages using rda and anova.cca functions (`{vegan}`).

We performed Student's t-test (`t.test {stats}`) or non-parametric Wilcoxon test (`wilcox.test {stats}`) (when normality was rejected with the Shapiro-Wilk test, (`shapiro.test {stats}`)) to compare oyster families for (i) alpha diversity metrics (Chao1, Simpson, evenness and Shannon), and (ii) distances to centroid.

Wilcoxon tests were used to identify candidates (OTUs or orders) related to (i) seawater or oysters, and to (ii) stressful or non-stressful periods.

Finally, we computed enrichment analyses of the significant OTUs to identify over-represented higher taxonomic ranks using Fisher's exact tests at each taxonomic rank.

For all analyses, the threshold significance level was set at 0.05. P-values were corrected for multiple comparisons using Benjamini and Hochberg's method [44] (`p.adjust, {stats}`).

## Results

### **Environmental conditions highly influenced oyster microbiota**

Oyster families were produced using wild genitors sampled from sites of high and low density of oyster populations. Full-sib progenies of five biparental families (F09, F15, F21, F32 and F44) were produced and maintained in a controlled condition (laboratory of Argenton, France). In order to study microbiota compositions in changing environments, individuals of each oyster family were then transplanted from the controlled condition into two natural environments at two time periods (non-stressful or stressful) for five days (Fig. 1). For the five conditions of this study, microbial communities were sequenced using the 16S rRNA gene from about 14 individuals of each oyster families (347 oyster-associated microbiota), and from seawater (19 filters). In average, each sample contained ~17,550 sequences representing ~1,140 OTUs (Fig. S2-S4, Table S2 and S3).

First, oyster microbiota were highly variable between the different conditions (Fig. 2 and Fig. S5). Particularly, we used redundancy analyses to identify factors (oyster family, period (non-stressful or stressful) and site (Atlantic Ocean and the Mediterranean Sea) of transplantation) that significantly explained microbiota changes in the Atlantic Ocean and the Mediterranean Sea. We found that the period and site of transplantation were the most important factors ( $p=0.001$ ) (Fig. 3A and Fig. S5). Hence, the environment highly influenced the composition of oyster microbiota.

### **Oyster tissues nevertheless exhibited different ecological niches from seawater**

Although environmental conditions highly influenced oyster microbiota, we found that oyster tissues constituted different ecological niches from seawater.

First, redundancy analysis also highlighted the effect of oyster family on oyster microbiota ( $p=0.001$ ) (Fig. 3A). In particular, this variable significantly constrained bacterial assemblages within the five conditions (Fig. 3B). Secondly, analyses of oyster-associated and seawater bacterial communities revealed that both types clustered separately within the five conditions (Fig. 2). Notably, the most abundant OTUs for seawater and oysters belonged to bacterial families Rhodobacteraceae (~16% of total sequences) and Mycoplasmataceae (~11.4% of total sequences), respectively. To identify significant differences between

seawater and oysters for OTUs, we computed non-parametric Wilcoxon tests. While we found OTUs with significantly higher relative abundances in seawater compared to oysters (Table S4 and Fig. S6), we did not observed OTUs significantly associated with oysters. This lack of significance might result from our stringent analysis procedure. Indeed, the combination of Wilcoxon tests and p-values corrections for multiple comparisons only kept highly significant OTUs. However, it suggested that most oyster OTUs came from the environment, although oyster tissues constrained their growth. Among them, 48 OTUs from the Proteobacteria, Bacteroidetes, Actinobacteria and Chloroflexi phyla were significantly higher in seawater for the four natural environments. Then we performed enrichment analyses of significant OTUs in each condition to identify taxonomic ranks that were over-represented in seawater. We found in particular that Proteobacteria from Rhodobacteraceae, Litoricolaceae, SAR86 and SAR116 families were enriched in seawater of natural environments.

Overall, these results suggested that oyster tissues constrained bacterial assemblages differently (i) from seawater, and even (ii) between oyster families having different genetic backgrounds.

## **Oyster families derived from farming area showed low mortality rates**

Then we particularly focused our attention on oyster microbiota and mortality rates in response to period of stress.

While no mortalities were observed for control and non-stressful periods in both the Atlantic Ocean and the Mediterranean Sea, many oysters died during stressful periods (in May and July for the Mediterranean and Atlantic sites, respectively). In particular, two oyster families (F15 and F32) displayed high mortality rates (hereafter named HM) (from 87 to 100%, n=125 oysters per family) in both geographic regions, whereas the three others (F09, F21 and F44) showed lower mortality rates (hereafter named LM) (from 0 to 52%, n=125 oysters per family) (Fig. 4). Notably, these two clusters of phenotypes were not linked to geographic origin of genitors (Atlantic Ocean or Mediterranean Sea), but rather to the fact that they originated or not from farming areas. This suggested that selective pressures by pathogens were higher in farming areas.

## **Microbiota of LM oysters were more diverse and stable in stressful periods**

Although high mortality rates affected HM oyster families, no clear pattern of microbiota dysbiosis was observed during stressful periods (Fig. 2). Oysters were placed for five days in the field, because previous observations showed that this time period was long enough for disease development, but not for mortality [27]. As a consequence, disease possibly just started after five days in our experiment, and we expected to find fine-scale changes of microbial communities rather than complete dysbiosis. We thus studied more precisely microbiota of LM and HM using alpha (Chao1, Simpson, evenness and Shannon) and beta (Bray-Curtis dissimilarities) diversity indices.

First, analyses of alpha diversity (Table S5) showed that LM had higher values of Simpson, evenness, and Shannon indices than HM in control, and in the stressful period for the Atlantic Ocean (Table 1). Moreover, LM had also higher values of evenness in the Mediterranean Sea, but we did not identify significant differences for Simpson and Shannon.

Secondly, we used Bray-Curtis dissimilarities and PCoA to estimate the variability of bacterial assemblages for LM and HM at different taxonomic ranks using distances to centroid as a proxy. We found that oyster-associated microbiota were less variable for LM than HM in controlled condition for many taxonomic ranks ( $p < 0.05$ , Wilcoxon test; except for family, class and phylum) (Table 2). Furthermore, while no significant differences were observed between LM and HM during the stressful period in the Mediterranean Sea, LM microbiota were also less variable than HM for the stressful period in the Atlantic Ocean considering higher taxonomic ranks (from order to class;  $p < 0.01$ , Wilcoxon test), but the opposite trend was observed for OTUs in the same region ( $p = 0.02$ , Wilcoxon test).

Hence, all these results suggested that although no clear pattern of microbiota dysbiosis was observed during stressful periods, microbiota of HM families had lower diversity than LM in the Atlantic Ocean. In addition, HM microbiota assemblages were more variable than LM at higher taxonomic ranks, and less variable for OTUs within this region. In contrast, few significant differences were observed in the Mediterranean Sea for microbiota diversity and assemblage variability. It suggested that disease development did not start before oysters were sampled after five days of transplantation in this region.

## **Microbiota of LM oysters had significant increase of cyanobacteria**

Our results revealed that oyster microbiota of LM showed higher variability and stability than HM in the Atlantic Ocean for OTU and orders, respectively. As a consequence, we used Wilcoxon tests to compare taxa of non-stressful and stressful periods within this region. In particular, we tried to identify parallel changes between oyster families of both LM and HM.

First, LM shared increased abundances of 16 OTUs in stressful period (Fig. 5A and Table S4), and HM had similar decreases for 29 OTUs (Table S4). In particular among them, five cyanobacteria and three Flavobacteriaceae were significant for LM, and 13 Flavobacteriaceae and five Erythrobacteraceae significantly decreased for HM. Then enrichment analyses of the significant OTUs for each oyster family highlighted that variability mostly concerned cyanobacteria (Subsection III, Family I) for all LM. In contrast, decreased OTUs over-represented Flavobacteriaceae and Erythrobacteraceae families for all HM. Furthermore, we found that although LM had similar increases for 3 bacterial orders in stressful period (Acidobacteria Subgroup 3, Holophagae Subgroup 10, Phycisphaerales), 4 other orders were stable compared to HM (Fig. 5B). Particularly, the relative abundances of Rhodospirillales increased in stressful period for HM, and the fraction of Rhodobacterales, Sphingomonadales, and Cytophagia (Order II) significantly decreased.

## Discussion

### Oyster microbiota were influenced by the environmental conditions

We found that the environment highly constrained oyster microbiota. This was not surprising because oysters are sessile organisms that filter seawater to feed. Hence, because they face continuous environmental changes, it is expected that microbiota reaches different stable states [45]. Moreover, stable interactions across environments may not be favored in oysters, because they do not have specialized anatomical structures hosting microbiota [17], such as nodules of legume plant [46], or light organ of bobtail squid [47]. As a consequence and according to our observations that oyster microbiota is highly variable, we hypothesize that oyster bacterial assemblages have high diversity, high horizontal transmission of facultative symbionts, high efficiency to purge deleterious mutations, and that they may facilitate rapid acclimation to environmental changes [17].

### Mortality rates were linked to the origin of genitors

Oysters were transplanted for five days in the field. According to previous observations [27], this time period was considered sufficient for disease development during stressful periods, and no mortalities were observed before oysters were sampled. As a consequence, we could analyze microbiota modifications linked to perturbations (*i.e.*, environmental changes), and not to moribund individuals.

To date, most oyster diseases were associated to *Vibrio* strains and *herpesvirus* (OsHV-1  $\mu$ var) [27,48,49], although other studies highlighted the role of *Roseovarius crassostreae* [50,51], *Tenacibaculum soleae* [52], and possibly Chlamydiales [53] and *Arcobacter* sp. [9,52]. Here we did not analyze the causal origin of diseases, but we observed similar mortality rates in both geographic regions. In particular, the five oyster families formed two clusters of low and high mortality rates during stressful periods in both the Atlantic Ocean and the Mediterranean Sea. Moreover, this clustering was highly associated to the origin of genitors from farming areas or sites with lower oyster densities. Thus these results highlighted that resistance to mortalities was (i) as previously observed influenced by oyster genetics [29], (ii) replicable between two French coastal regions, and (iii) higher for oyster families derived from genitors sampled in farming areas. Because aquaculture uses very high oyster densities, and is affected by many mortality syndroms [21,54], it is likely that selective pressures from

pathogens are higher in these areas. The low mortalities observed in this study for oyster progenies derived from genitors of farming areas thus suggested that past events might influence their current immune responses. In particular, these different mortality levels might be linked to transgenerational immune priming [55], and/or to natural selection of genetic variants.

# **Stability for bacterial orders and variability of OTUs were linked to oyster mortalities**

No clear patterns of microbiota dysbiosis were observed in both stressful periods for HM oyster families, suggesting that oysters were sampled before the massive community structure disruption that occurred for moribund and dead oysters [9]. In order to identify fine-scale modifications of oyster microbiota during disease development, we thus performed analyses of alpha diversity indices and variability of microbial assemblages using distances to centroid as a proxy.

Higher values of alpha diversity indices (Simpson, evenness, Shannon) was the most striking parallel found for LM compared to HM for the stressful period of the Atlantic Ocean. Particularly, this result highlighted that OTU abundances within LM microbiota were more equally distributed than HM microbiota. For example, evenness may possibly have important effects on oyster fitness, because it was already found to be positively linked to ecosystem productivity [56,57], functional stability [58,59], and invasion resistance [60,61]. Furthermore, for the stressful period of the Atlantic Ocean, LM were more stable than HM for higher taxonomic ranks, and more variable for OTUs. Similar results of stability were also obtained for hydra [16], and in oyster hemolymph [9]. However, we precisely identified the stable taxonomic ranks in this study (*i.e.*, from order to class).

Surprisingly, we did not find significant differences between HM and LM in the Mediterranean Sea for variability of microbial assemblages, and only evenness and Chao1 were significant for alpha diversity indices. Because oysters were all sampled after five days of transplantation, it is very likely that disease development was different between both geographic regions, and even between oyster families. Thus first signs of microbiota dysbiosis were possibly missed in this study if they occurred later in the Mediterranean Sea. For instance, it was observed in a previous work that primate microbiota was altered at the very last stages of a viral infection [62].

# **Rhodospirillales, Rhodobacterales, Flavobacteriaceae, Erythrobacteraceae and cyanobacteria are putative candidates associated to oyster fitness**

Because stability and variability of microbiota are putative beneficial characteristics of the holobiont [11,16], we tried to identify taxa related to LM and HM in the Atlantic Ocean where differences for microbiota diversity and stability were observed. We particularly focused our attention on parallel changes between oyster families, as they could point out factors involved in adaptive processes [63–65]. Furthermore, parallels are likely to be reproducible in future studies.

Similarly to *C. virginica* oysters from Hackberry Bay [66], Mycoplasmataceae was the dominant taxa of oyster microbiota in this study. Despite this dominance, stability of the Rhodospirillales and Rhodobacterales orders, and Erythrobacteraceae and Flavobacteriaceae families might be the most important factor for oyster fitness. Indeed, HM had high significant changes for both orders between non-stressful and stressful periods. Moreover, enrichment analysis showed that Erythrobacteraceae and Flavobacteriaceae families were over-represented by OTUs that significantly decreased between both time periods. Among them, Erythrobacteraceae were already isolated from marine invertebrates [67], and Rhodospirillales were found in diseased tissues of *Platygyra carnosus* corals [68]. Conversely, presence and variability of cyanobacteria OTUs might be linked to rapid acclimation of oyster holobiont to environmental changes. Indeed, increased OTUs in stressful period for LM over-represented cyanobacteria (Subsection III, Family I). Although cyanobacteria had a negative effect on other marine invertebrates such as scleractinian corals [69], they were already observed at high relative abundances within oyster microbiota [70]. Particularly, they were abundant in the digestive gland, connective tissue, mantle, and gonad of oysters [71]. Because cyanobacteria persisted in oyster tissues without signs of alterations, a possible endosymbiotic relationship was even proposed [71]. Notably, cyanobacteria were also negatively correlated to culturable *Vibrio* abundance in free-living microbial communities [72]. Hence, cyanobacteria might play a role of barrier for competitors/pathogens, because vibrios are the main bacterial pathogens of oysters [54]. In particular, photosynthetic activity of cyanobacteria could inhibited pathogen growth through the production of reactive oxygen species, such as observed for *Plasmodium* infection in *Anopheles gambiae* [73].

## Conclusions

Our study highlighted that oyster microbiota were highly influenced by environmental conditions. However, different ecological niches existed for bacterial communities between seawater and oyster tissues, and even between oyster families having different genetic backgrounds. Although similar mortality rates were observed for each family in the two geographic regions 12 days after transplantation, disease development during stressful periods were possibly more advanced at the time of sampling in the Atlantic Ocean compared to the Mediterranean Sea. Thus, we recommended that future studies control disease development in order to compare microbiota of different individuals at the same stage of infection. For the Atlantic Ocean, we identified many links between microbiota characteristics and oyster mortalities, and particularly that LM had higher diversity, higher variability of bacterial OTUs and higher stability of bacterial orders and classes compared to HM. Furthermore, Rhodospiralles and Rhodobacterales orders, as well as Erythrobacteraceae, Flavobacteriaceae, and cyanobacteria (Subsection III, Family I) families were putative candidates associated with oyster fitness.

However, we did not know whether these differences were causes or consequences of the observed mortalities. Hence, experimental microbiota manipulations might help in the future to understand if such modifications favored oysters facing recurrent mortality syndroms. For example, they might lead to develop farming procedures using bacterial probiotics.

## Declarations

Ethics approval and consent to participate: Not applicable.

Consent for publication: Not applicable.

Availability of data and materials: The datasets generated during the current study are available in the Sequence Read Archive repository under BioProject ID PRJNA419907 (to be released upon publication).

Competing interests: The authors declare that they have no competing interests.

Funding: CC benefited of post-doctoral fellowships from CNRS and IFREMER. This work was supported by the French National Research Agency ANR, project ANR-14-CE19-0023

DECIPHER (coordinator G. Mitta) and the DHOF program of the UMR5244/IHPE (<http://ihpe.univ-perp.fr/en/ihpe-transversal-holobiont/>). This project has received funding from the European Union's Horizon 2020 Research and innovation programme under grant agreement N° 678589.

Authors' contributions: CC, JDL, JME, YG, GM and ET were involved in the study concept and design. BP was involved in the generation and maintaining of all animals used in this study. JDL, BP, JME, YG, GM and ET were involved in the collection of samples. CC, JDL, AL and ET were involved in data acquisition and analysis. CC and ET drafted the manuscript and all authors contributed to critical revisions and approved the final manuscript.

Acknowledgements: We thank IHPE members for stimulating discussions. We are grateful to the genotoul bioinformatics platform Toulouse Midi-Pyrenees and Sigenae group for providing help and computing resources thanks to Galaxy instance <http://sigenae-workbench.toulouse.inra.fr>.

461

## References

- 462 1. Guidot A, Jiang W, Ferdy J-B, Thebaud C, Barberis P, Gouzy J, et al. Multihost  
463 experimental evolution of the pathogen *Ralstonia solanacearum* unveils genes involved in  
464 adaptation to plants. *Mol Biol Evol.* 2014;31:2913–28.
- 465 2. Wilkinson CR. Microbial associations in sponges. II. Numerical analysis of sponge and  
466 water bacterial populations. *Mar Biol.* 1978;49:169–176.
- 467 3. Epstein B, Branca A, Mudge J, Bharti AK, Briskine R, Farmer AD, et al. Population  
468 genomics of the facultatively mutualistic bacteria *Sinorhizobium meliloti* and *S. medicae*.  
469 *PLoS Genet.* 2012;8:e1002868.
- 470 4. Brooks AW, Kohl KD, Brucker RM, van Opstal EJ, Bordenstein SR. Phyllosymbiosis:  
471 relationships and functional effects of microbial communities across host evolutionary  
472 history. *PLOS Biol.* 2016;14:e2000225.
- 473 5. Rohwer F, Seguritan V, Azam F, Knowlton N, others. Diversity and distribution of coral-  
474 associated bacteria. *Mar Ecol Prog Ser.* 2002;243:1–10.
- 475 6. Fraune S, Bosch TC. Long-term maintenance of species-specific bacterial microbiota in the  
476 basal metazoan *Hydra*. *Proc Natl Acad Sci.* 2007;104:13146–13151.
- 477 7. Roterman YR, Benayahu Y, Reshef L, Gophna U. The gill microbiota of invasive and  
478 indigenous *Spondylus* oysters from the Mediterranean Sea and northern Red Sea. *Environ*  
479 *Microbiol Rep.* 2015;7:860–7.
- 480 8. Cárdenas A, Rodríguez-R LM, Pizarro V, Cadavid LF, Arévalo-Ferro C. Shifts in bacterial  
481 communities of two caribbean reef-building coral species affected by white plague disease.  
482 *ISME J.* 2012;6:502–512.
- 483 9. Lokmer A, Wegner KM. Hemolymph microbiome of Pacific oysters in response to  
484 temperature, temperature stress and infection. *ISME J.* 2015;9:670–682.
- 485 10. McFall-Ngai M, Hadfield MG, Bosch TC, Carey HV, Domazet-Lošo T, Douglas AE, et  
486 al. Animals in a bacterial world, a new imperative for the life sciences. *Proc Natl Acad Sci.*  
487 2013;110:3229–3236.
- 488 11. Miller CP, Bohnhoff M, Rifkind D. The effect of an antibiotic on the susceptibility of the  
489 mouse's intestinal tract to *Salmonella* infection. *Trans Am Clin Climatol Assoc.* 1957;68:51.
- 490 12. Oliver KM, Russell JA, Moran NA, Hunter MS. Facultative bacterial symbionts in aphids  
491 confer resistance to parasitic wasps. *Proc Natl Acad Sci.* 2003;100:1803–1807.
- 492 13. Clay K. Fungal endophytes of grasses. *Annu Rev Ecol Syst.* 1990;21:275–97.
- 493 14. Woodhams DC, Vredenburg VT, Simon M-A, Billheimer D, Shakhtour B, Shyr Y, et al.  
494 Symbiotic bacteria contribute to innate immune defenses of the threatened mountain yellow-  
495 legged frog, *Rana muscosa*. *Biol Conserv.* 2007;138:390–8.
- 496 15. Fraune S, Forêt S, Reitzel AM. Using *Nematostella vectensis* to study the interactions  
497 between genome, epigenome, and bacteria in a changing environment. *Front Mar Sci.*  
498 2016;3:148.
- 499 16. Mortzfeld BM, Urbanski S, Reitzel AM, Künzel S, Technau U, Fraune S. Response of  
500 bacterial colonization in *Nematostella vectensis* to development, environment and  
501 biogeography. *Environ Microbiol.* 2016;18:1764–1781.
- 502 17. Shapira M. Gut microbiotas and host evolution: scaling up symbiosis. *Trends Ecol Evol.*  
503 2016;31:539–49.
- 504 18. Sommer F, Bäckhed F. The gut microbiota - masters of host development and physiology.  
505 *Nat Rev Microbiol.* 2013;11:227–38.
- 506 19. Wang J, Linnenbrink M, Künzel S, Fernandes R, Nadeau M-J, Rosenstiel P, et al. Dietary  
507 history contributes to enterotype-like clustering and functional metagenomic content in the  
508 intestinal microbiome of wild mice. *Proc Natl Acad Sci.* 2014;111:E2703–10.
- 509 20. Carmody RN, Gerber GK, Luevano JM, Gatti DM, Somes L, Svenson KL, et al. Diet

dominates host genotype in shaping the murine gut microbiota. *Cell Host Microbe*. 2015;17:72–84.

21. Barbosa Solomieu V, Renault T, Travers M-A. Mass mortality in bivalves and the intricate case of the Pacific oyster, *Crassostrea gigas*. *J Invertebr Pathol*. 2015;131:2–10.

22. Pernet F, Lupo C, Bacher C, Whittington RJ. Infectious diseases in oyster aquaculture require a new integrated approach. *Philos Trans R Soc B Biol Sci*. 2016;371:20150213.

23. Malham SK, Cotter E, O’Keeffe S, Lynch S, Culloty SC, King JW, et al. Summer mortality of the Pacific oyster, *Crassostrea gigas*, in the Irish Sea: the influence of temperature and nutrients on health and survival. *Aquaculture*. 2009;287:128–38.

24. Pernet F, Barret J, Le Gall P, Corporeau C, Dégremont L, Lagarde F, et al. Mass mortalities of Pacific oysters *Crassostrea gigas* reflect infectious diseases and vary with farming practices in the Mediterranean Thau lagoon, France. *Aquac Environ Interact*. 2012;2:215–37.

25. Petton B, Pernet F, Robert R, Boudry P. Temperature influence on pathogen transmission and subsequent mortalities in juvenile Pacific oysters *Crassostrea gigas*. *Aquac Environ Interact*. 2013;3:257–73.

26. Dégremont L, Lamy J-B, Pépin J-F, Travers M-A, Renault T. New insight for the genetic evaluation of resistance to Ostreid herpesvirus infection, a worldwide disease, in *Crassostrea gigas*. *PloS One*. 2015;10:e0127917.

27. Petton B, Bruto M, James A, Labreuche Y, Alunno-Bruscia M, Le Roux F. *Crassostrea gigas* mortality in France: the usual suspect, a herpes virus, may not be the killer in this polymicrobial opportunistic disease. *Front Microbiol*. 2015;6:686.

28. Dégremont L, Bédier E, Soletchnik P, Ropert M, Huvet A, Moal J, et al. Relative importance of family, site, and field placement timing on survival, growth, and yield of hatchery-produced Pacific oyster spat (*Crassostrea gigas*). *Aquaculture*. 2005;249:213–29.

29. Samain JF, Dégremont L, Soletchnik P, Haure J, Bédier E, Ropert M, et al. Genetically based resistance to summer mortality in the Pacific oyster (*Crassostrea gigas*) and its relationship with physiological, immunological characteristics and infection processes. *Aquaculture*. 2007;268:227–43.

30. Wendling CC, Fabritzek AG, Wegner KM. Population-specific genotype x genotype x environment interactions in bacterial disease of early life stages of Pacific oyster larvae. *Evol Appl*. 2017;10:338–47.

31. Le Roux F. Diagnosis of vibriosis in the era of genomics: lessons from invertebrates. *Rev Sci Tech OIE*. 2016;35:259–69.

32. Dégremont L, Nourry M, Maurouard E. Mass selection for survival and resistance to OsHV-1 infection in *Crassostrea gigas* spat in field conditions: response to selection after four generations. *Aquaculture*. 2015;446:111–21.

33. Bruto M, James A, Petton B, Labreuche Y, Chenivesse S, Alunno-Bruscia M, et al. *Vibrio crassostreae*, a benign oyster colonizer turned into a pathogen after plasmid acquisition. *ISME J*. 2017;11:1043–52.

34. Rico-Villa B, Pouvreau S, Robert R. Influence of food density and temperature on ingestion, growth and settlement of Pacific oyster larvae, *Crassostrea gigas*. *Aquaculture*. 2009;287:395–401.

35. Klindworth A, Pruesse E, Schweer T, Peplies J, Quast C, Horn M, et al. Evaluation of general 16S ribosomal RNA gene PCR primers for classical and next-generation sequencing-based diversity studies. *Nucleic Acids Res*. 2013;41:e1–e1.

36. Escudié F, Auer L, Bernard M, Mariadassou M, Cauquil L, Vidal K, et al. FROGS: Find, Rapidly, OTUs with Galaxy Solution. *Bioinformatics*. 2017;doi:10.1093/bioinformatics/btx791.

37. Magoc T, Salzberg SL. FLASH: fast length adjustment of short reads to improve genome

assemblies. *Bioinformatics*. 2011;27:2957–63.

38. Martin M. Cutadapt removes adapter sequences from high-throughput sequencing reads. *EMBnet J*. 2011;17:pp–10.

39. Mahé F, Rognes T, Quince C, de Vargas C, Dunthorn M. Swarm v2: highly-scalable and high-resolution amplicon clustering. *PeerJ*. 2015;3:e1420.

40. Rognes T, Flouri T, Nichols B, Quince C, Mahé F. VSEARCH: a versatile open source tool for metagenomics. *PeerJ*. 2016;4:e2584.

41. McMurdie PJ, Holmes S. phyloseq: An R package for reproducible interactive analysis and graphics of microbiome census data. Watson M, editor. *PLoS ONE*. 2013;8:e61217.

42. Ramette A. Multivariate analyses in microbial ecology. *FEMS Microbiol Ecol*. 2007;62:142–60.

43. Legendre P, Gallagher E. Ecologically meaningful transformations for ordination of species data. *Oecologia*. 2001;129:271–80.

44. Benjamini Y, Hochberg Y. Controlling the false discovery rate: a practical and powerful approach to multiple testing. *J R Stat Soc Ser B*. 1995;289–300.

45. Sommer F, Anderson JM, Bharti R, Raes J, Rosenstiel P. The resilience of the intestinal microbiota influences health and disease. *Nat Rev Microbiol*. 2017;15:630–8.

46. Udvardi M, Poole PS. Transport and metabolism in legume-rhizobia symbioses. *Annu Rev Plant Biol*. 2013;64:781–805.

47. McFall-Ngai MJ. The importance of microbes in animal development: lessons from the squid-*Vibrio* symbiosis. *Annu Rev Microbiol*. 2014;68:177–94.

48. Labreuche Y, Soudant P, Goncalves M, Lambert C, Nicolas J. Effects of extracellular products from the pathogenic *Vibrio aestuarianus* strain 01/32 on lethality and cellular immune responses of the oyster *Crassostrea gigas*. *Dev Comp Immunol*. 2006;30:367–79.

49. Batista FM, López-Sanmartín M, Grade A, Morgado I, Valente M, Navas JJ, et al. Sequence variation in ostreid herpesvirus 1 microvar isolates detected in dying and asymptomatic *Crassostrea angulata* adults in the Iberian Peninsula: insights into viral origin and spread. *Aquaculture*. 2015;435:43–51.

50. Boettcher KJ. *Roseovarius crassostreae* sp. nov., a member of the *Roseobacter* clade and the apparent cause of juvenile oyster disease (JOD) in cultured Eastern oysters. *Int J Syst Evol Microbiol*. 2005;55:1531–7.

51. Maloy AP, Ford SE, Karney RC, Boettcher KJ. *Roseovarius crassostreae*, the etiological agent of Juvenile Oyster Disease (now to be known as *Roseovarius* Oyster Disease) in *Crassostrea virginica*. *Aquaculture*. 2007;269:71–83.

52. Burioli EAV, Varello K, Trancart S, Bozzetta E, Gorla A, Prearo M, et al. First description of a mortality event in adult Pacific oysters in Italy associated with infection by a *Tenacibaculum soleae* strain. *J Fish Dis*. 2017;1–7.

53. Renault T, Cochenne N. Chlamydia-like organisms in ctenidia and mantle cells of the Japanese oyster *Crassostrea gigas* from the French Atlantic coast. *Dis Aquat Organ*. 1995;23:153–9.

54. Le Roux F, Wegner KM, Polz MF. Oysters and vibrios as a model for disease dynamics in wild animals. *Trends Microbiol*. 2016;24:568–80.

55. Wang L, Yue F, Song X, Song L. Maternal immune transfer in mollusc. *Dev Comp Immunol*. 2015;48:354–9.

56. Wilsey BJ, Potvin C. Biodiversity and ecosystem functioning: importance of species evenness in an old field. *Ecology*. 2000;81:887–892.

57. Zhang Y, Chen HYH, Reich PB. Forest productivity increases with evenness, species richness and trait variation: a global meta-analysis. *J Ecol*. 2012;100:742–9.

58. Balvanera P, Kremen C, Martínez-Ramos M. Applying community structure analysis to ecosystem function: examples from pollination and carbon storage. *Ecol Appl*. 2005;15:360–

375.

59. Wittebolle L, Marzorati M, Clement L, Balloi A, Daffonchio D, Heylen K, et al. Initial community evenness favours functionality under selective stress. *Nature*. 2009;458:623–6.

60. Wilsey BJ, Polley HW. Reductions in grassland species evenness increase dicot seedling invasion and spittle bug infestation. *Ecol Lett*. 2002;5:676–684.

61. De Roy K, Marzorati M, Negroni A, Thas O, Balloi A, Fava F, et al. Environmental conditions and community evenness determine the outcome of biological invasion. *Nat Commun*. 2013;4:1383.

62. Barbian HJ, Li Y, Ramirez M, Klase Z, Lipende I, Mjungu D, et al. Destabilization of the gut microbiome marks the end-stage of simian immunodeficiency virus infection in wild chimpanzees. *Am J Primatol*. 2015;doi:10.1002/ajp.22515.

63. Tenaillon O, Rodriguez-Verdugo A, Gaut RL, McDonald P, Bennett AF, Long AD, et al. The molecular diversity of adaptive convergence. *Science*. 2012;335:457–61.

64. Marvig RL, Sommer LM, Molin S, Johansen HK. Convergent evolution and adaptation of *Pseudomonas aeruginosa* within patients with cystic fibrosis. *Nat Genet*. 2014;47:57–64.

65. Harrison E, Guymer D, Spiers AJ, Paterson S, Brockhurst MA. Parallel compensatory evolution stabilizes plasmids across the parasitism-mutualism continuum. *Curr Biol*. 2015;25:2034–9.

66. King GM, Judd C, Kuske CR, Smith C. Analysis of stomach and gut microbiomes of the Eastern oyster (*Crassostrea virginica*) from coastal Louisiana, USA. Neufeld J, editor. *PLoS ONE*. 2012;7:e51475.

67. Ivanova EP, Bowman JP, Lysenko AM, Zhukova NV, Gorshkova NM, Kuznetsova TA, et al. *Erythrobacter vulgaris* sp. nov., a novel organism isolated from the marine invertebrates. *Syst Appl Microbiol*. 2005;28:123–30.

68. Ng JCY, Chan Y, Tun HM, Leung FCC, Shin PKS, Chiu JMY. Pyrosequencing of the bacteria associated with *Platygyra carnosus* corals with skeletal growth anomalies reveals differences in bacterial community composition in apparently healthy and diseased tissues. *Front Microbiol*. 2015;6:1142.

69. Meyer JL, Gunasekera SP, Scott RM, Paul VJ, Teplitski M. Microbiome shifts and the inhibition of quorum sensing by Black Band Disease cyanobacteria. *ISME J*. 2016;10:1204–1216.

70. Chauhan A, Wafula D, Lewis DE, Pathak A. Metagenomic assessment of the Eastern oyster-associated microbiota. *Genome Announc*. 2014;2:e01083-14-e01083-14.

71. Avila-Poveda OH, Torres-Ariño A, Girón-Cruz DA, Cuevas-Aguirre A. Evidence for accumulation of *Synechococcus elongatus* (Cyanobacteria: Cyanophyceae) in the tissues of the oyster *Crassostrea gigas* (Mollusca: Bivalvia). *Tissue Cell*. 2014;46:379–87.

72. Turner JW, Good B, Cole D, Lipp EK. Plankton composition and environmental factors contribute to *Vibrio* seasonality. *ISME J*. 2009;3:1082.

73. Cirimotich CM, Dong Y, Clayton AM, Sandiford SL, Souza-Neto JA, Mulenga M, et al. Natural microbe-mediated refractoriness to plasmodium infection in *Anopheles gambiae*. *Science*. 2011;332:855–8.

## Legends of figures

**FIG. 1. Experimental design.** Five oyster full-sib families produced with genitors from different origins in terms of geography (Atlantic Ocean or Mediterranean Sea) and area (from farming area or sites where densities of oyster populations were lower) were produced in controlled condition (hatchery), and placed for five days in natural conditions in the Atlantic Ocean (latitude: 48.335263; longitude: 4.317922) or the Mediterranean Sea (latitude: 43.379087; longitude: 3.571483) at two time periods (non-stressful or stressful). Then, oysters were flash frozen, DNA were extracted, and microbiota were sequenced using 16S rRNA gene-metabarcoding.

**FIG. 2. Clustering analyses of microbial communities in the five conditions.** Dark blue, light blue, black, light green, dark green, and orange boxes correspond to F09, F15, F21, F32, F44 and seawater, respectively. Clustering were computed using Bray-Curtis dissimilarities based on relative abundances of OTUs, and the average linkage method.

**FIG. 3. Redundancy analyses of oyster microbiota.** Plots show cumulative variations explained by the addition of variables using redundancy analysis. Period: period of transplantation (stressful or non-stressful). Site: site of transplantation (Atlantic Ocean or Mediterranean Sea). Family: oyster families. Residuals: fraction not explained by the variables used in this study. **A.** Analyses based on the microbiota samples from Atlantic Ocean and Mediterranean Sea. **B.** Analyses of the five conditions.

**FIG. 4. Mortalities rates (%) for the five oyster families recorded for the transplantation experiments realized during stressful periods.** Mortalities were estimated 12 days after individuals were placed in the Atlantic Ocean or in the Mediterranean Sea sites.

**FIG. 5. Variability and stability of LM microbiota compared to HM in the Atlantic Ocean.** **A.** Significant increased OTUs for all LM and no HM. **B.** Significant changes of bacterial orders for all HM and no LM.

## 678 Tables

679 **Table 1. Comparison of alpha diversity indices between LM and HM.** Numbers into  
680 brackets are p-values. NS: not significant. LM or HM indicate which group had significantly  
681 higher values.

| Index    | Hatchery<br>(control) | Med. Sea<br>(non-<br>stressful) | Atl. Ocean<br>(non-<br>stressful) | Med. Sea<br>(stressful) | Atl. Ocean<br>(stressful) |
|----------|-----------------------|---------------------------------|-----------------------------------|-------------------------|---------------------------|
| Chao1    | NS (0.74)             | LM (0.042)                      | NS (0.199)                        | HM (0.033)              | NS (0.080)                |
| Simpson  | LM (0.005)            | NS (0.848)                      | HM (0.024)                        | NS (0.059)              | LM (<0.001)               |
| Evenness | LM (0.003)            | NS (0.722)                      | NS (0.918)                        | LM (0.039)              | LM (<0.001)               |
| Shannon  | LM (0.004)            | NS (0.565)                      | NS (0.913)                        | NS (0.085)              | LM (<0.001)               |

682

683 **Table 2. Comparison of microbiota variability between LM and HM.** Numbers into  
684 brackets are p-values. NS: not significant. LM and HM indicate which group had significantly  
685 higher values.

| Taxonomic<br>rank | Hatchery<br>(control) | Med. Sea<br>(non-<br>stressful) | Atl. Ocean<br>(non-<br>stressful) | Med. Sea<br>(stressful) | Atl. Ocean<br>(stressful) |
|-------------------|-----------------------|---------------------------------|-----------------------------------|-------------------------|---------------------------|
| OTU               | HM (0.044)            | HM (0.036)                      | NS (0.427)                        | NS (0.278)              | LM (0.023)                |
| Genus             | HM (0.026)            | NS (0.889)                      | NS (0.358)                        | NS (0.730)              | NS (0.507)                |
| Family            | NS (0.925)            | NS (0.676)                      | NS (0.385)                        | NS (0.694)              | NS (0.944)                |
| Order             | HM (0.036)            | NS (0.676)                      | NS (0.376)                        | NS (0.793)              | HM (0.012)                |
| Class             | NS (0.828)            | NS (0.464)                      | NS (0.239)                        | NS (0.909)              | HM (0.001)                |
| Phylum            | NS (0.844)            | NS (0.076)                      | LM (0.020)                        | NS (0.938)              | NS (0.865)                |

686

687

## Supplementary informations

**FIG. S1. Origin of the five oyster full-sib families.** F09, F21 and F44 were isolated in farming area, where densities of oyster populations and pathogens are expected to be high. F09: Logonna Daoulas (latitude: 48.335263; longitude: -4.317922); F15: Dellec (latitude: 48.353970; longitude: -4.566123); F21: Charente Maritime (latitude: 45.781741; longitude: -1.121910); F32: Vidourle (latitude: 43.553906; longitude: 4.095175); F44: pond of Thau (latitude: 43.418736; longitude: 3.622620).

**FIG. S2. Rarefaction analysis of species richness for oyster microbiota and filters in the controlled condition (hatchery).**

**FIG. S3. Rarefaction analysis of species richness for oyster microbiota and filters in the Mediterranean Sea.** SW: seawater.

**FIG. S4. Rarefaction analysis of species richness for oyster microbiota and filters in the Atlantic Ocean.** SW: seawater.

**FIG. S5. Clustering analyses of oyster microbiota from the whole samples of natural environments.** For the family variable, dark blue, light blue, black, light green, and dark green boxes correspond to F09, F15, F21, F32, and F44, respectively. For the geographic origin, dark and light blue correspond to Atlantic Ocean and Mediterranean Sea, respectively. For area of origin, dark and light blue correspond to farming and non-farming areas, respectively. For transplantation site, dark and light blue correspond to Atlantic Ocean and Mediterranean Sea, respectively. For period of transplantation, dark and light blue correspond to stressful and non-stressful periods, respectively. Mortality rates (%) and temperatures from low to high are indicated by light to dark red. Clustering were computed using Bray-Curtis dissimilarities based on relative abundances of OTUs, and the average linkage method.

**FIG. S6. Similarities for significant OTUs between the five conditions (A) and oyster families (B).** Black numbers indicate seawater- and stressful-associated OTUs for the five conditions and oyster families, respectively. Red numbers indicate oyster- and non-stressful-associated OTUs for the five conditions and oyster families, respectively. This figure summarizes informations given in Table S4.

718 **TABLE S1. Temperatures in the five conditions.**

719 **TABLE S2. Number of sequences and OTUs.**

720 **TABLE S3. OTU annotations and abundances in the 347 oyster microbiota and on the**  
 721 **19 filters of seawater microbial communities.**

722 **TABLE S4. Significant OTUs.** For columns *Seawater- or oyster-associated*, *seawater* and  
 723 *oyster* indicate if abundances of each OTU were higher in seawater or within oysters,  
 724 respectively ( $p < 0.05$ , Wilcoxon test). For columns *Stressful- or non-stressful-associated*,  
 725 *stressful* and *non-stressful* indicate if abundances of each OTU were higher in stressful or  
 726 non-stressful periods for each oyster family, respectively ( $p < 0.05$ , Wilcoxon test). NS: not  
 727 significant. NT: not tested (absent from the dataset).

728 **TABLE S5. Metadata and alpha diversity indices.**

729

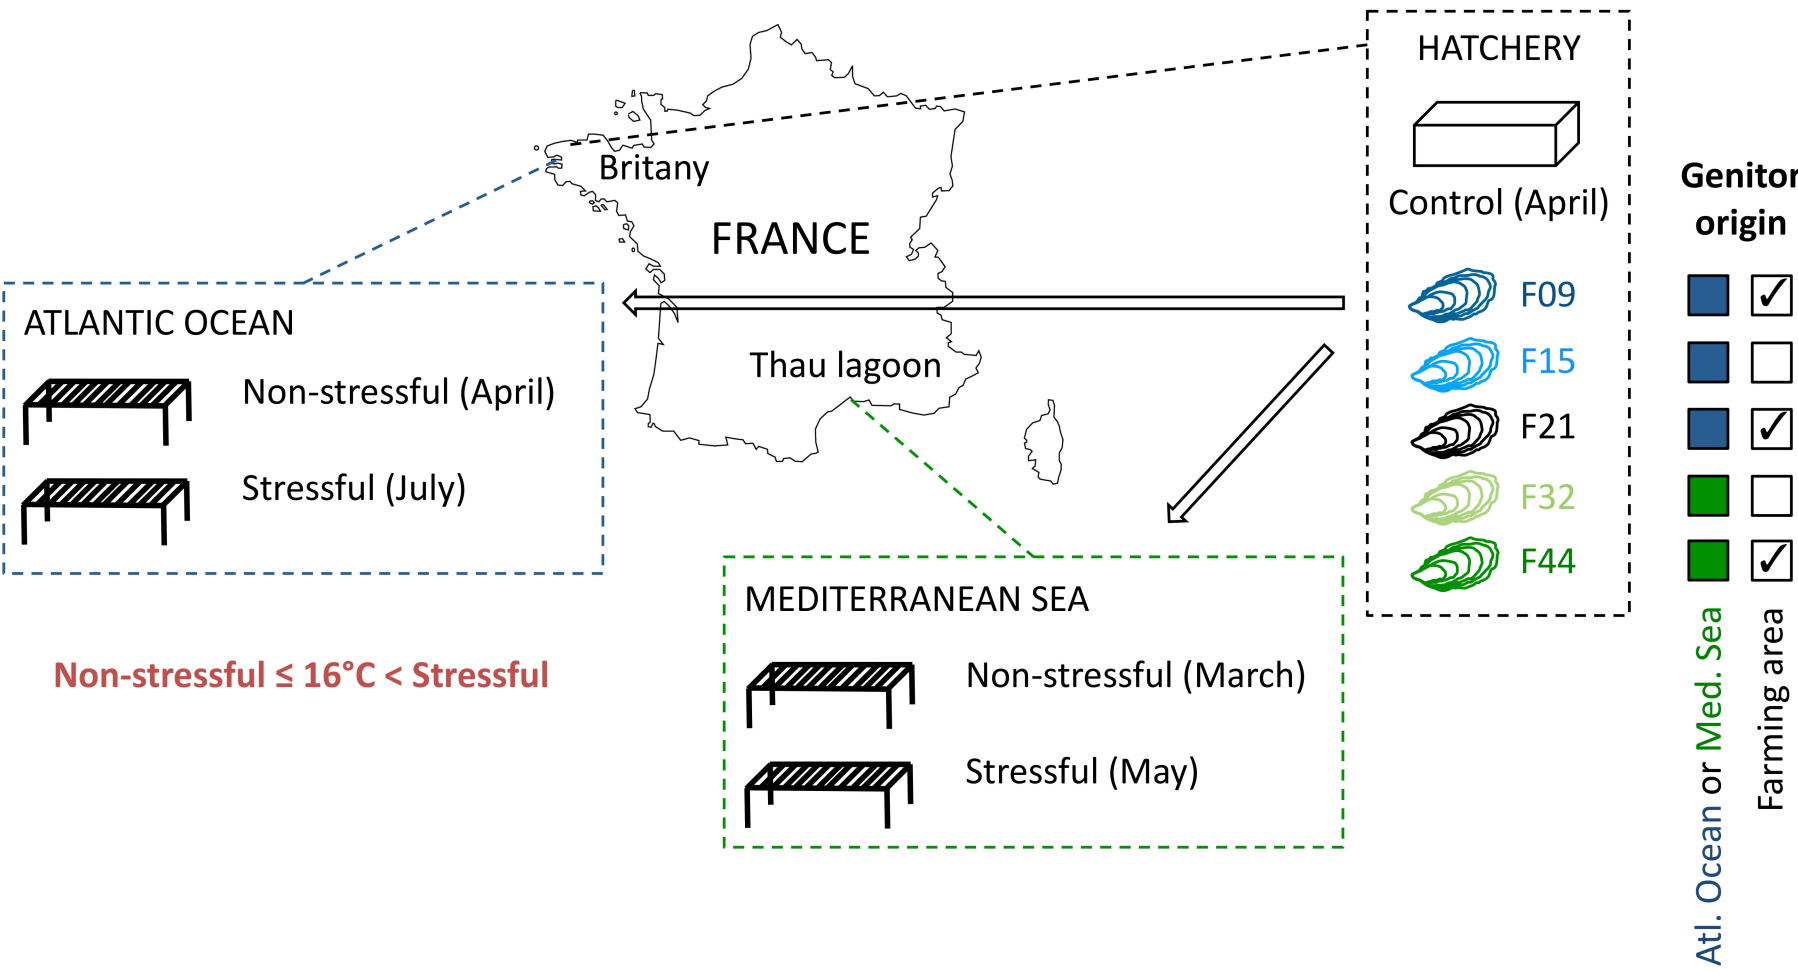

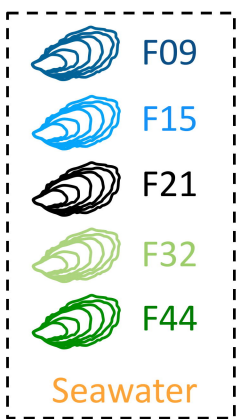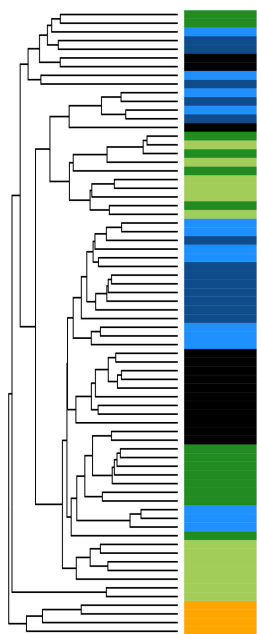

Hatchery  
(control)

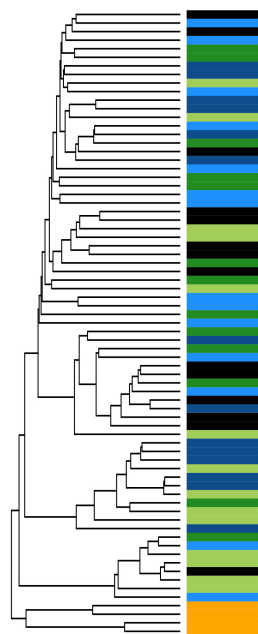

Med. Sea  
(non-stressful)

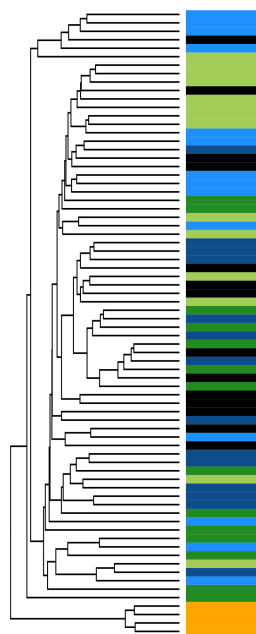

Atl. Ocean  
(non-stressful)

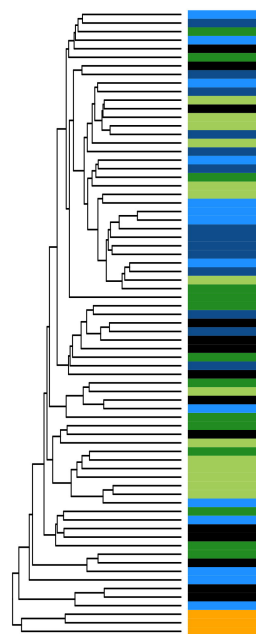

Med. Sea  
(stressful)

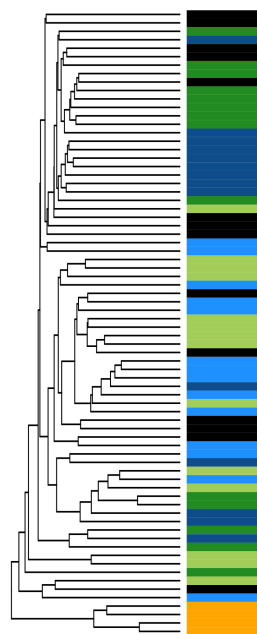

Atl. Ocean  
(stressful)

**A****Variation of oyster microbiota (%)**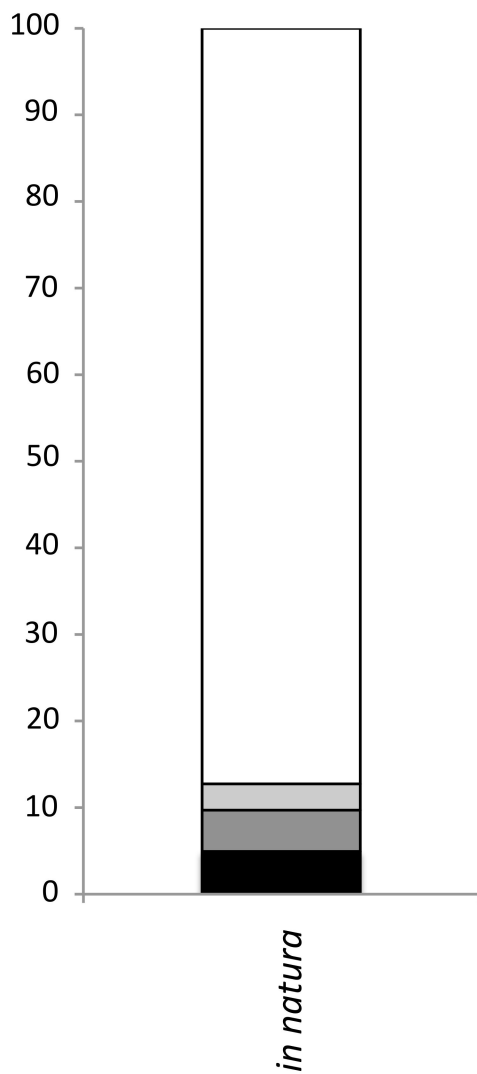**B**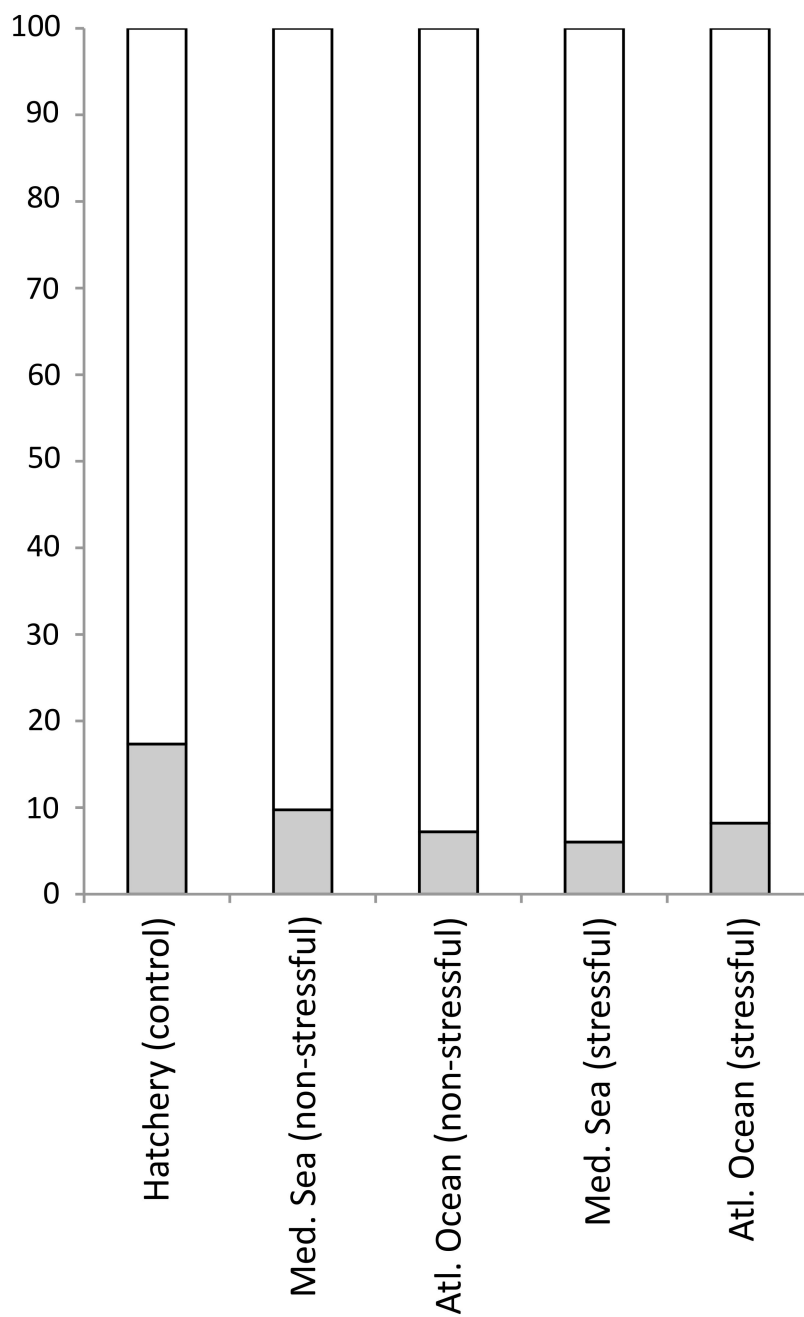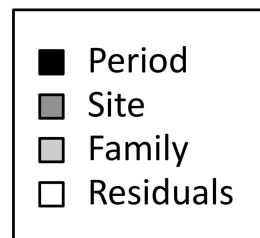

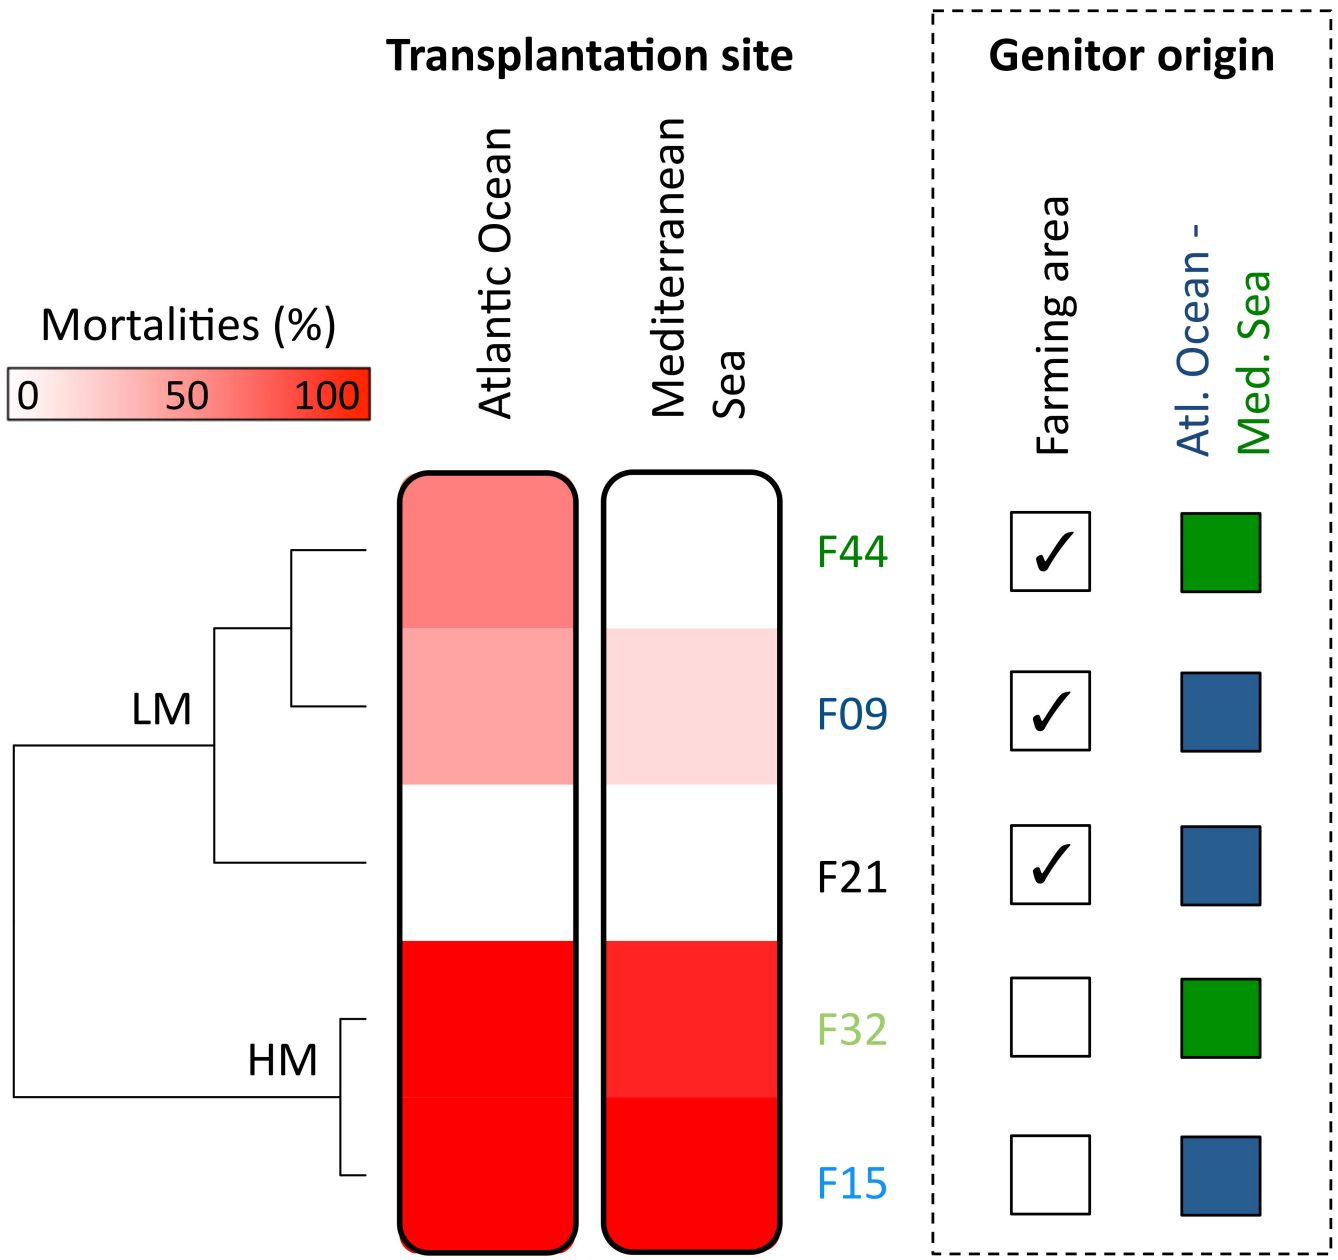

**A**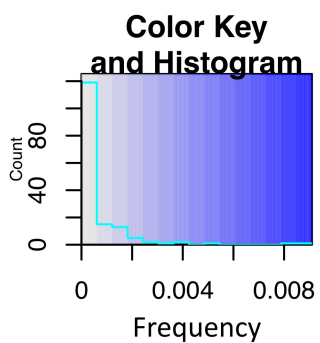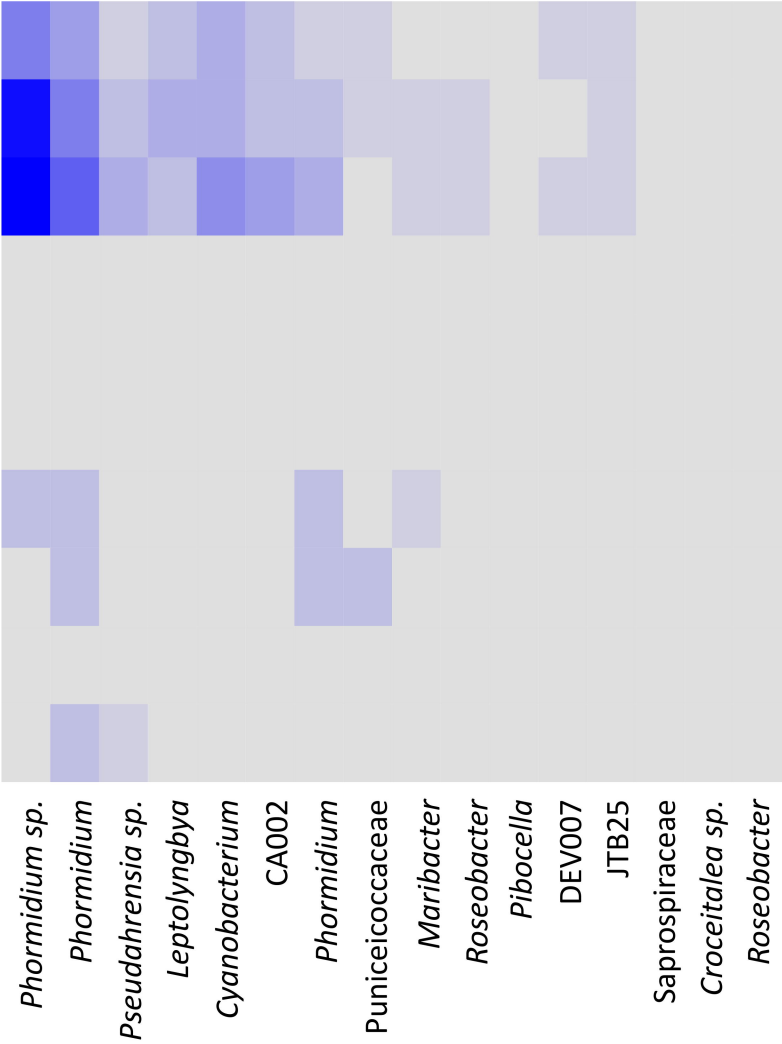**B**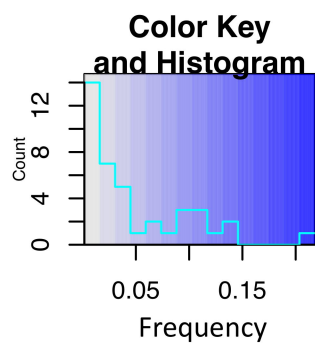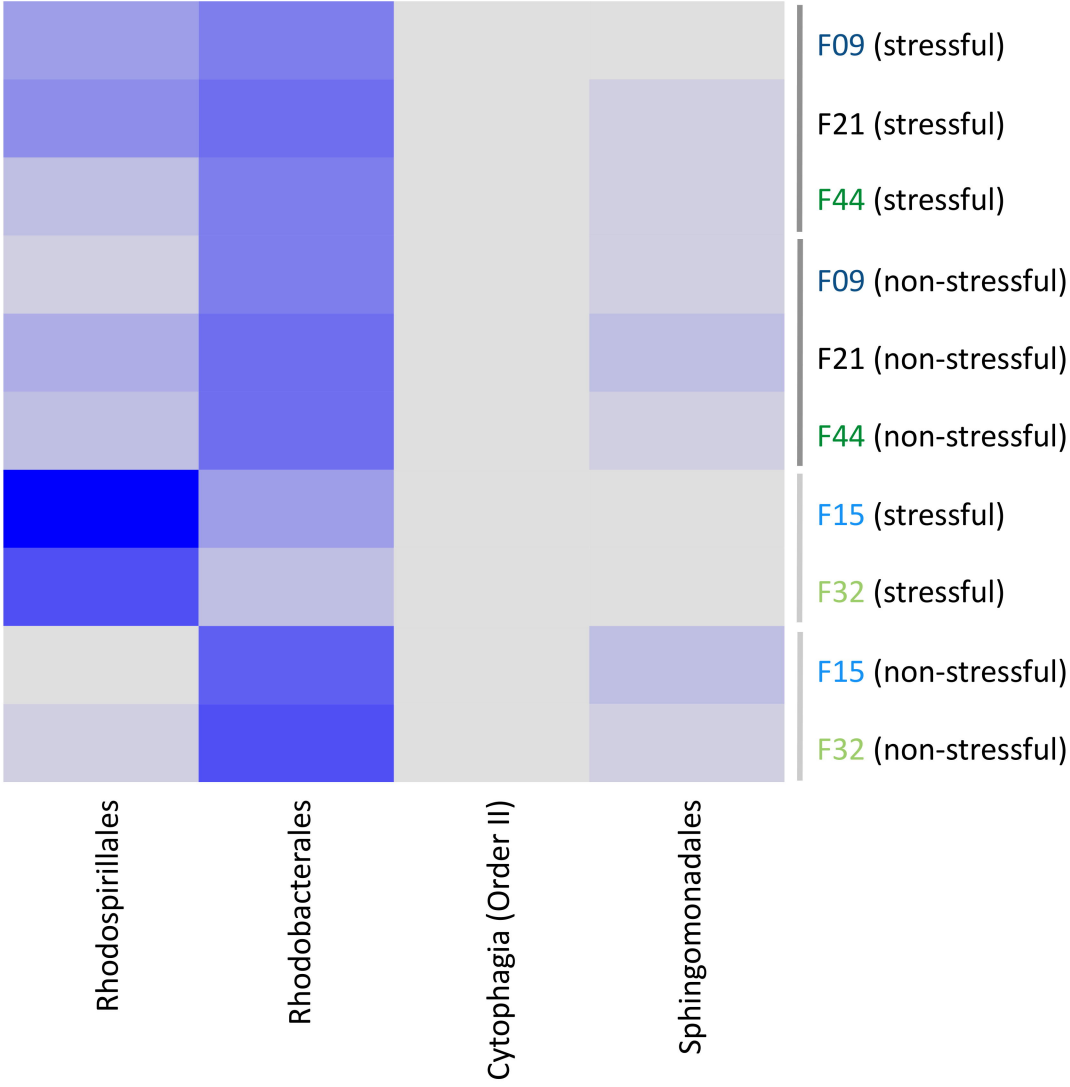

Source: http://biorxiv.org/content/10.1101/378125v1.full.pdf
